# Supplementary material for: Theoretical study of a CuCo dual-atom catalyst for nitrogen fixation
Source: Royal Society of Chemistry journal article supplement (doi:10.1039/d4ra06077f), 2024-01-01
Supplement: d4ra06077f1.pdf [file d4ra06077f1.pdf]

## Theoretical study of a CuCo dual-atom catalyst for nitrogen fixation

Miaomiao Han<sup>1\*</sup>, Yu Zhang<sup>1</sup>, Chenyu Zhang<sup>1</sup>

<sup>1</sup> School of Science, Huzhou University, Huzhou, Zhejiang 313000, China

### Corresponding Author

\*Email: mmhan@zjhu.edu.cn

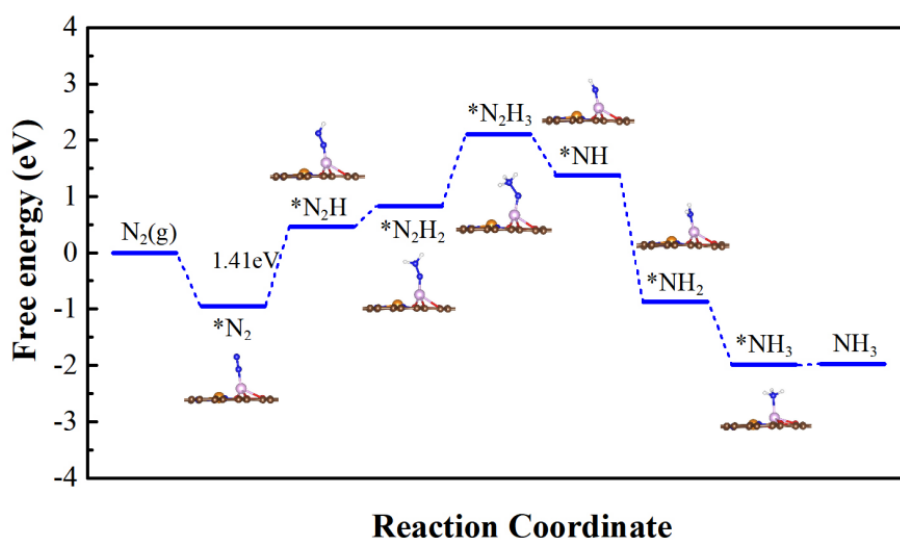

Fig. S1. Free energy diagram along the reaction path of NRR proceeded on N-CuCo-O starting with  $N_2$  adsorbed on Co site.

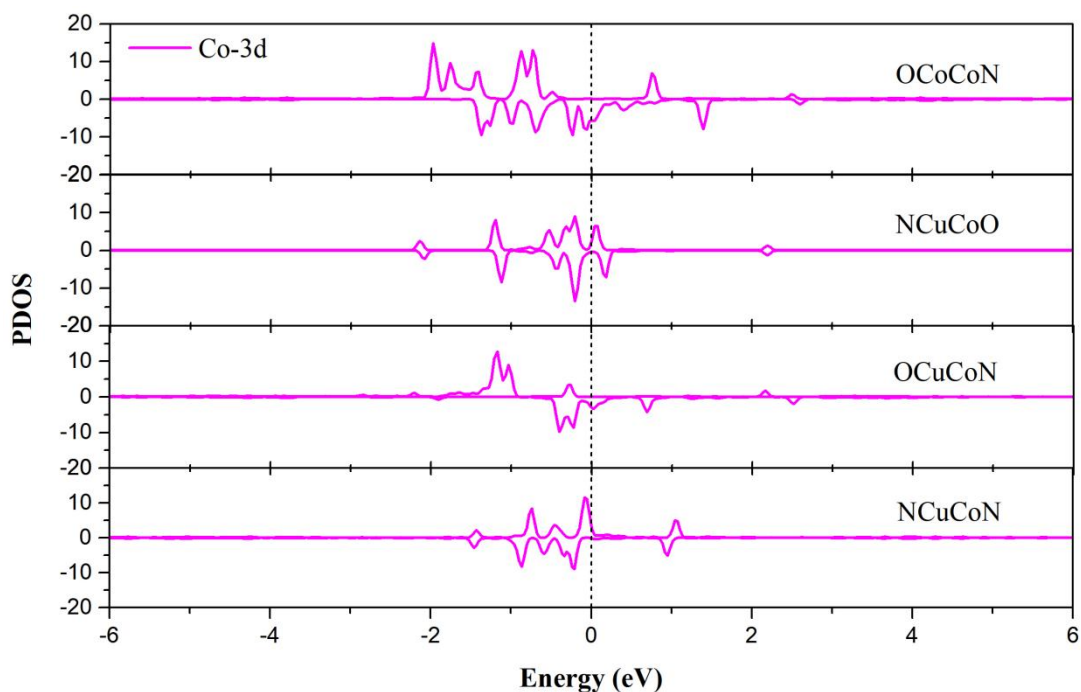

Fig. S2. The projected density of states of Co-3d in different configurations.

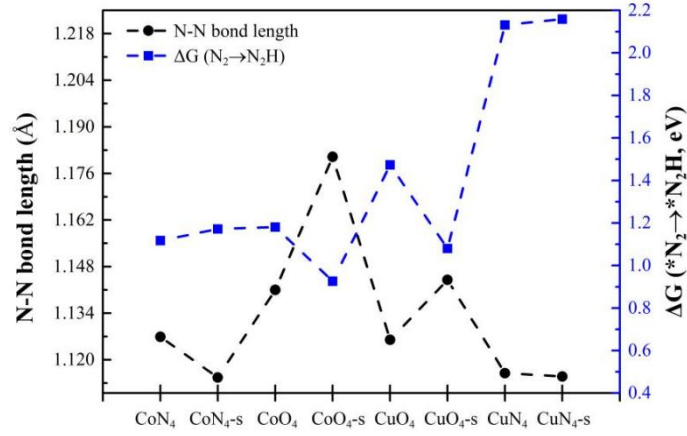

Fig. S3. The relationship between N-N bond length of adsorbed \*N<sub>2</sub> and Gibbs free energy change ΔG from \*N<sub>2</sub> to \*N<sub>2</sub>H on different SACs.

Table SI. calculated energy(E), zero point energy(ZPE) and contribution from entropy(TS) of O-CuCo-N DAC.

| O-CuCo-N (side-on)               | E        | ZPE   | TS    |
|----------------------------------|----------|-------|-------|
| *N <sub>2</sub>                  | -639.300 | 0.204 | 0.106 |
| *NNH-Cu                          | -642.549 | 0.530 | 0.084 |
| *NNH-Co                          | -642.289 | 0.530 | 0.084 |
| *NHNH                            | -646.228 | 0.835 | 0.11  |
| *NNH <sub>2</sub>                | -645.308 | 0.826 | 0.123 |
| *NH <sub>2</sub> NH              | -649.771 | 1.149 | 0.160 |
| *NH <sub>2</sub> NH <sub>2</sub> | -654.360 | 1.319 | 0.179 |
| *NH <sub>2</sub> NH <sub>3</sub> | -659.042 | 1.700 | 0.228 |
| *NH <sub>3</sub>                 | -642.495 | 1.04  | 0.10  |
| *NH <sub>3</sub> NH <sub>3</sub> | -662.789 | 2.074 | 0.198 |
| O-CuCo-N (end-on)                | E        | ZPE   | TS    |
| *Co-N <sub>2</sub>               | -639.306 | 0.196 | 0.160 |
| *N <sub>2</sub> H                | -642.318 | 0.506 | 0.120 |
| *N <sub>2</sub> H <sub>2</sub>   | -646.008 | 0.820 | 0.139 |
| *N <sub>2</sub> H <sub>3</sub>   | -648.798 | 1.159 | 0.154 |
| *NH                              | -634.440 | 0.341 | 0.089 |
| *NH <sub>2</sub>                 | -639.233 | 0.713 | 0.076 |

|                  |          |       |       |
|------------------|----------|-------|-------|
| *NH <sub>3</sub> | -642.492 | 1.018 | 0.127 |
|------------------|----------|-------|-------|

Table SII calculated energy(E), zero point energy(ZPE) and contribution from entropy(TS) of O-CoCo-O DAC.

| O-CoCo-O<br>(side-on)            | Energy   | ZPE   | TS    |
|----------------------------------|----------|-------|-------|
| *N <sub>2</sub>                  | -631.469 | 0.203 | 0.106 |
| *N <sub>2</sub> H                | -634.771 | 0.513 | 0.098 |
| *NHNH                            | -638.346 | 0.889 | 0.346 |
| *NH <sub>2</sub> N               | -637.697 | 0.829 | 0.121 |
| *NH <sub>2</sub> NH              | -641.992 | 1.134 | 0.167 |
| *NH <sub>2</sub> NH <sub>2</sub> | -646.944 | 1.309 | 0.261 |
| *NH <sub>3</sub> NH              | -646.468 | 1.280 | 0.216 |
| *NH <sub>3</sub> NH <sub>2</sub> | -651.269 | 1.683 | 0.229 |
| *NH <sub>3</sub> NH <sub>3</sub> | -654.432 | 2.032 | 0.323 |
